# Supplementary material for: Methodological Approach for Optimizing Production of Oxygen by Adsorption of Nitrogen from Air using Zeolite Li‐LSX
Source: Hindawi journal article supplement (doi:10.1155/2022/7254646), 2022-01-01
Supplement: f1 [file 7254646.f1.pdf]

Table S1: Oxygen purity as a function of time for different flow rates, input pressure 2.5 bar and height of packing 9cm. For Fig. 4

| time(sec) | 2L min <sup>-1</sup> | 4L min <sup>-1</sup> | 6 Lmin <sup>-1</sup> | 8 Lmin <sup>-1</sup> | 10 Lmin <sup>-1</sup> |
|-----------|----------------------|----------------------|----------------------|----------------------|-----------------------|
| 0         | 20.0847              | 19.92569             | 20.29017             | 20.31697083          | 20.15796              |
| 1         | 20.11329             | 19.96857             | 20.35271             | 20.42060089          | 20.31697              |
| 2         | 20.07756             | 19.93819             | 20.42596             | 20.40094757          | 20.42239              |
| 3         | 20.08828             | 19.9775              | 20.42596             | 20.47241592          | 20.69933              |
| 4         | 20.12401             | 20.09721             | 20.52066             | 20.60105896          | 22.02863              |
| 5         | 20.18476             | 20.24551             | 20.79223             | 20.89586258          | 23.96719              |
| 6         | 20.29732             | 20.31697             | 21.48011             | 21.30858994          | 26.79554              |
| 7         | 20.44561             | 20.37593             | 22.67005             | 21.69987488          | 29.93834              |
| 8         | 20.64037             | 20.48135             | 24.40493             | 22.06793594          | 32.82206              |
| 9         | 20.83154             | 20.87442             | 26.39174             | 22.38596725          | 35.3681               |
| 10        | 21.05845             | 21.51764             | 28.53042             | 22.6450386           | 37.61756              |
| 11        | 21.3604              | 22.3145              | 30.73341             | 22.88803101          | 39.5186               |
| 12        | 21.72846             | 23.18641             | 32.93998             | 23.10958099          | 41.05516              |
| 13        | 22.11082             | 24.11549             | 35.16085             | 23.38830566          | 42.3255               |
| 14        | 22.49496             | 25.04993             | 37.37099             | 23.73670959          | 43.34034              |
| 15        | 22.86123             | 25.99867             | 39.54361             | 24.10119629          | 44.32303              |
| 16        | 23.20427             | 26.97599             | 41.64477             | 24.46389771          | 45.3611               |
| 17        | 23.53124             | 27.98011             | 43.6691              | 24.87483597          | 46.44205              |
| 18        | 23.82069             | 28.97709             | 45.57907             | 25.33758926          | 47.55516              |
| 19        | 24.08869             | 29.94905             | 47.46047             | 25.88610458          | 48.55214              |
| 20        | 24.37992             | 30.95139             | 49.32756             | 26.69548035          | 49.33828              |
| 21        | 24.71046             | 31.90549             | 51.09818             | 28.13019562          | 49.84749              |
| 22        | 25.06244             | 32.85244             | 52.77232             | 30.0830574           | 50.17446              |
| 23        | 25.42693             | 33.76544             | 54.33746             | 32.32714844          | 50.41745              |
| 24        | 25.77712             | 34.66772             | 55.74359             | 34.62662506          | 50.87484              |
| 25        | 26.12195             | 35.50032             | 57.02823             | 36.82247543          | 51.95044              |
| 26        | 26.45428             | 36.29719             | 58.1735              | 38.8861084           | 53.4727               |
| 27        | 26.76695             | 37.06011             | 59.19013             | 40.78715515          | 54.89133              |
| 28        | 27.06354             | 37.78193             | 60.07633             | 42.51310349          | 56.01695              |
| 29        | 27.3637              | 38.4573              | 60.8464              | 44.04072952          | 56.87279              |
| 30        | 27.61742             | 39.09694             | 61.53606             | 45.35216522          | 57.52493              |
| 31        | 27.88542             | 39.76159             | 62.14711             | 46.44741058          | 58.01806              |
| 32        | 28.12305             | 40.37979             | 62.70099             | 47.41043854          | 58.39862              |
| 33        | 28.39106             | 40.96404             | 63.07441             | 48.19301224          | 58.82207              |
| 34        | 28.68764             | 41.52685             | 63.45676             | 48.9362793           | 59.31699              |
| 35        | 29.02712             | 42.0575              | 63.73191             | 49.70812988          | 59.73507              |
| 36        | 29.36838             | 42.58815             | 64.02135             | 50.45318222          | 60.01201              |
| 37        | 29.7007              | 43.13488             | 64.35725             | 51.15714264          | 60.14244              |
| 38        | 29.9973              | 43.6691              | 64.74854             | 51.79320526          | 60.24428              |
| 39        | 30.28138             | 44.16044             | 65.13268             | 52.33457565          | 60.32647              |
| 40        | 30.56904             | 44.62141             | 65.49538             | 52.78660965          | 60.0799               |
| 41        | 30.90672             | 45.03949             | 65.83664             | 53.16539001          | 59.68683              |

|    |          |          |          |             |          |
|----|----------|----------|----------|-------------|----------|
| 42 | 31.30516 | 45.43257 | 66.15646 | 53.44947052 | 58.26105 |
| 43 | 31.76612 | 45.78276 | 66.51022 | 53.67638397 | 57.52493 |
| 44 | 32.2664  | 46.12045 | 66.69783 | 53.86398315 | 56.77809 |
| 45 | 32.79169 | 46.44741 | 66.90151 | 53.99084473 | 56.38144 |
| 46 | 33.30268 | 46.75472 | 67.05338 | 54.07839203 | 56.4815  |
| 47 | 33.82083 | 47.03881 | 67.19096 | 54.13913727 | 56.89244 |
| 48 | 34.31574 | 47.29966 | 67.31245 | 54.16415405 | 57.30516 |
| 49 | 34.82674 | 47.49263 | 67.43037 | 54.17844391 | 57.63749 |
| 50 | 35.30021 | 47.67844 | 67.53757 | 54.17487335 | 57.9716  |
| 51 | 35.78619 | 47.79636 | 67.58224 | 54.16950989 | 58.33966 |
| 52 | 36.26681 | 47.96253 | 67.6019  | 54.15879059 | 58.62017 |
| 53 | 36.7528  | 47.81602 | 67.58582 | 54.15164185 | 58.92034 |
| 54 | 37.22091 | 47.60162 | 67.54294 | 54.14985657 | 59.23837 |
| 55 | 37.68545 | 47.43188 | 67.43216 | 54.14807129 | 59.57069 |
| 56 | 38.15178 | 47.37113 | 67.39459 | 54.14807129 | 59.79939 |
| 57 | 38.58952 | 47.4551  | 67.41374 | 54.14807129 | 59.92625 |
| 58 | 39.00403 | 47.66594 | 67.37924 | 54.14628601 | 60.00307 |
| 59 | 39.43999 | 47.94823 | 67.34592 | 54.14628601 | 60.0942  |
| 60 | 39.79018 | 48.28949 | 67.26463 | 54.14270782 | 59.72971 |
| 61 | 40.15824 | 48.65577 | 67.24991 | 54.13735199 | 59.41525 |
| 62 | 40.52451 | 49.03455 | 67.19847 | 54.12663269 | 59.46528 |
| 63 | 40.8747  | 49.38831 | 67.1834  | 54.10876465 | 59.68683 |
| 64 | 41.1981  | 49.72778 | 67.09394 | 54.08732605 | 59.91731 |
| 65 | 41.53936 | 50.05296 | 66.97452 | 54.06230927 | 60.11564 |
| 66 | 41.85381 | 50.3442  | 66.9108  | 54.05516052 | 60.26036 |
| 67 | 42.17006 | 50.58004 | 66.89836 | 54.05873871 | 60.35684 |
| 68 | 42.45057 | 50.81588 | 66.79166 | 54.06767273 | 60.39258 |
| 69 | 42.74359 | 51.03207 | 66.65524 | 54.08017731 | 60.39972 |
| 70 | 42.9973  | 51.24469 | 66.5984  | 54.08554077 | 60.43188 |
| 71 | 43.25994 | 51.42157 | 66.50929 | 54.07839203 | 60.4033  |
| 72 | 43.50651 | 51.60024 | 66.46594 | 54.05337524 | 60.25143 |
| 73 | 43.71912 | 51.79142 | 66.41306 | 54.03015137 | 60.03166 |
| 74 | 43.94246 | 51.92899 | 66.38572 | 53.99798584 | 59.62251 |
| 75 | 44.15865 | 52.10052 | 66.31466 | 53.96582794 | 59.04898 |
| 76 | 44.34983 | 52.20951 | 66.29518 | 53.92295074 | 58.44686 |
| 77 | 44.52671 | 52.15948 | 66.21715 | 53.8818512  | 57.88763 |
| 78 | 44.71074 | 51.97902 | 66.17471 | 53.85326386 | 57.39986 |
| 79 | 44.86797 | 51.72174 | 66.10265 | 53.81395721 | 56.97462 |
| 80 | 45.03234 | 51.44301 | 66.06975 | 53.7728653  | 56.63515 |
| 81 | 45.19136 | 51.09461 | 65.92165 | 53.73177338 | 56.32963 |
| 82 | 45.32536 | 50.73727 | 65.8894  | 53.67816925 | 56.02589 |
| 83 | 45.45937 | 50.35849 | 65.80779 | 53.64243317 | 55.73823 |
| 84 | 45.5755  | 49.96363 | 65.76688 | 53.57990265 | 55.41841 |
| 85 | 45.69342 | 49.56877 | 65.7631  | 53.53166199 | 55.10574 |
| 86 | 45.8042  | 49.15425 | 65.70044 | 53.47627258 | 54.83952 |
| 87 | 45.89354 | 48.74331 | 65.67855 | 53.42803192 | 54.54829 |
| 88 | 45.99359 | 48.34488 | 65.54715 | 53.38694    | 54.28029 |

|     |          |          |          |             |          |
|-----|----------|----------|----------|-------------|----------|
| 89  | 46.06148 | 47.97504 | 65.49358 | 53.32797623 | 54.06588 |
| 90  | 46.1258  | 47.62484 | 65.39969 | 53.27259064 | 53.8765  |
| 91  | 46.19548 | 47.28358 | 65.34669 | 53.19576263 | 53.77644 |
| 92  | 46.22943 | 46.96555 | 65.29058 | 53.13144302 | 53.77823 |
| 93  | 46.27053 | 46.6636  | 65.2554  | 53.07247925 | 53.77644 |
| 94  | 46.29554 | 46.41167 | 65.16151 | 53.01173401 | 53.77287 |
| 95  | 46.29375 | 46.13474 | 65.07436 | 52.96349335 | 53.40838 |
| 96  | 46.28304 | 45.93105 | 64.97367 | 52.92061234 | 52.81877 |
| 97  | 46.26338 | 45.77561 | 64.89718 | 52.87237167 | 52.77768 |
| 98  | 46.23122 | 45.6559  | 64.79055 | 52.84556961 | 52.96706 |
| 99  | 46.20442 | 45.55942 | 64.62916 | 52.80090332 | 53.24579 |
| 100 | 46.15082 | 45.49689 | 64.51501 | 52.75266266 | 53.61921 |
| 101 | 46.10258 | 45.43971 | 64.44904 | 52.71156693 | 53.87471 |
| 102 | 46.05076 | 45.42006 | 64.38026 | 52.64188766 | 53.9962  |
| 103 | 45.99359 | 45.41113 | 64.27032 | 52.57756424 | 54.18916 |
| 104 | 45.93105 | 45.40398 | 64.16125 | 52.50252533 | 54.31781 |
| 105 | 45.86316 | 45.40577 | 64.06883 | 52.41497421 | 54.38927 |
| 106 | 45.76846 | 45.38075 | 63.97843 | 52.33814621 | 54.4268  |
| 107 | 45.68806 | 45.41113 | 63.8725  | 52.25417328 | 54.43037 |
| 108 | 45.60766 | 45.40577 | 63.8424  | 52.1737709  | 54.34282 |
| 109 | 45.53083 | 45.31643 | 63.73245 | 52.10409164 | 54.16772 |
| 110 | 45.4415  | 45.2128  | 63.65887 | 52.04155731 | 54.05695 |
| 111 | 45.38254 | 45.07166 | 63.5804  | 51.97366333 | 53.8086  |
| 112 | 45.28963 | 44.90907 | 63.43003 | 51.92363358 | 53.71569 |
| 113 | 45.20208 | 44.73933 | 63.37399 | 51.86645889 | 53.56561 |
| 114 | 45.13062 | 44.56602 | 63.2937  | 51.81464767 | 53.4048  |
| 115 | 45.05736 | 44.38199 | 63.18446 | 51.7556839  | 53.19398 |
| 116 | 44.97874 | 44.17652 | 62.96857 | 51.67528534 | 53.21006 |
| 117 | 44.90728 | 43.98891 | 62.70523 | 51.56451035 | 53.66745 |
| 118 | 44.82688 | 43.78881 | 62.61898 | 51.44837189 | 54.34818 |
| 119 | 44.65178 | 43.59048 | 62.54437 | 51.34653091 | 54.41965 |
| 120 | 43.89601 | 43.37786 | 62.46154 | 51.24468994 | 53.96583 |

Table S2: O<sub>2</sub> % as a function of time for different heights of packing; input pressure 2.5 bar and inlet flow rate 6 Lmin<sup>-1</sup>. For Fig. 5

| time(sec) | 9 cm     | 12 cm    | 16 cm    |
|-----------|----------|----------|----------|
| 0         | 19.99001 | 20.29017 | 22.35958 |
| 1         | 20.07398 | 20.35271 | 25.03193 |
| 2         | 20.07398 | 20.42596 | 27.6728  |
| 3         | 20.10971 | 20.42596 | 28.42858 |
| 4         | 20.15796 | 20.52066 | 30.12951 |
| 5         | 20.24551 | 20.79223 | 32.29499 |
| 6         | 20.35449 | 21.48011 | 34.53372 |

|    |          |          |          |
|----|----------|----------|----------|
| 7  | 20.44383 | 22.67005 | 36.71885 |
| 8  | 20.6082  | 24.40493 | 39.16841 |
| 9  | 20.93695 | 26.39174 | 41.91099 |
| 10 | 21.57838 | 28.53042 | 44.65535 |
| 11 | 22.39133 | 30.73341 | 47.51585 |
| 12 | 22.99881 | 32.93998 | 50.15659 |
| 13 | 23.44191 | 35.16085 | 52.71157 |
| 14 | 23.84034 | 37.37099 | 54.98425 |
| 15 | 24.21019 | 39.54361 | 57.0586  |
| 16 | 24.71404 | 41.64477 | 58.80956 |
| 17 | 25.53592 | 43.6691  | 60.45154 |
| 18 | 26.49716 | 45.57907 | 61.98273 |
| 19 | 27.51558 | 47.46047 | 63.44247 |
| 20 | 28.50183 | 49.32756 | 64.73604 |
| 21 | 29.41126 | 51.09818 | 65.93134 |
| 22 | 30.26351 | 52.77232 | 67.09984 |
| 23 | 31.05859 | 54.33746 | 68.15935 |
| 24 | 31.76077 | 55.74359 | 69.15453 |
| 25 | 32.4272  | 57.02823 | 70.03538 |
| 26 | 33.03468 | 58.1735  | 70.81616 |
| 27 | 33.58855 | 59.19013 | 71.44687 |
| 28 | 34.09419 | 60.07633 | 71.97752 |
| 29 | 34.57481 | 60.8464  | 72.40811 |
| 30 | 35.00541 | 61.53606 | 72.78332 |
| 31 | 35.41813 | 62.14711 | 72.98521 |
| 32 | 35.79512 | 62.70099 | 73.14602 |
| 33 | 36.17926 | 63.07441 | 73.13887 |
| 34 | 36.60986 | 63.45676 | 73.11323 |
| 35 | 37.02437 | 63.73191 | 73.10531 |
| 36 | 37.41387 | 64.02135 | 73.06672 |
| 37 | 37.78014 | 64.35725 | 72.85201 |
| 38 | 38.15535 | 64.74854 | 72.81146 |
| 39 | 38.49125 | 65.13268 | 72.71695 |
| 40 | 38.8611  | 65.49538 | 72.67401 |
| 41 | 39.25595 | 65.83664 | 72.59668 |
| 42 | 39.62759 | 66.15646 | 72.48824 |
| 43 | 40.00458 | 66.51022 | 72.35226 |
| 44 | 40.35835 | 66.69783 | 72.24616 |
| 45 | 40.69961 | 66.90151 | 72.1466  |
| 46 | 41.02836 | 67.05338 | 72.09222 |
| 47 | 41.32853 | 67.19096 | 71.99228 |
| 48 | 41.61261 | 67.31245 | 71.8623  |
| 49 | 41.87347 | 67.43037 | 71.75697 |
| 50 | 42.11288 | 67.53757 | 71.645   |
| 51 | 42.36481 | 67.58224 | 71.53923 |
| 52 | 42.58993 | 67.6019  | 71.42679 |
| 53 | 42.79719 | 67.48154 | 71.31848 |

|     |          |          |          |
|-----|----------|----------|----------|
| 54  | 42.98301 | 67.2324  | 71.28904 |
| 55  | 43.17239 | 67.04238 | 71.1792  |
| 56  | 43.34392 | 66.86182 | 71.06537 |
| 57  | 43.49757 | 66.54207 | 70.57069 |
| 58  | 43.65659 | 66.41943 | 70.49299 |
| 59  | 43.80131 | 66.39236 | 70.3485  |
| 60  | 43.94603 | 66.28216 | 70.2485  |
| 61  | 44.14972 | 66.14609 | 70.14703 |
| 62  | 44.38199 | 65.85347 | 70.06525 |
| 63  | 44.72503 | 65.64225 | 69.98519 |
| 64  | 45.13062 | 65.40738 | 69.8633  |
| 65  | 45.52547 | 65.36926 | 69.74654 |
| 66  | 45.87745 | 65.20802 | 69.624   |
| 67  | 46.19548 | 65.09836 | 69.50469 |
| 68  | 46.45098 | 64.96489 | 69.49739 |
| 69  | 46.68325 | 64.71117 | 69.37025 |
| 70  | 46.89051 | 64.58402 | 69.25665 |
| 71  | 47.06025 | 64.36929 | 69.13443 |
| 72  | 47.20318 | 64.15939 | 69.08264 |
| 73  | 47.31753 | 63.83055 | 68.97875 |
| 74  | 47.41044 | 63.62086 | 68.82028 |
| 75  | 47.47655 | 63.47215 | 68.76512 |
| 76  | 47.54623 | 63.25108 | 68.65044 |
| 77  | 47.58732 | 63.06171 | 68.54905 |
| 78  | 47.60162 | 62.93747 | 68.41997 |
| 79  | 47.59268 | 62.72418 | 68.3678  |
| 80  | 47.55516 | 62.56975 | 68.31404 |
| 81  | 47.50335 | 62.36522 | 68.27366 |
| 82  | 47.42295 | 62.17129 | 68.22708 |
| 83  | 47.32289 | 61.85779 | 68.16116 |
| 84  | 47.2139  | 61.26688 | 68.09103 |
| 85  | 47.09241 | 61.09967 | 67.98706 |
| 86  | 46.97091 | 60.90044 | 67.91919 |
| 87  | 46.83155 | 60.78548 | 67.86547 |
| 88  | 46.70291 | 60.54715 | 67.84474 |
| 89  | 46.58856 | 60.35837 | 67.77023 |
| 90  | 46.4885  | 60.16883 | 67.67125 |
| 91  | 46.41882 | 60.08904 | 67.5684  |
| 92  | 46.34557 | 59.84091 | 67.43155 |
| 93  | 46.29375 | 59.64016 | 67.3998  |
| 94  | 46.24015 | 59.42316 | 67.27279 |
| 95  | 46.19548 | 59.27436 | 67.18803 |
| 96  | 46.12938 | 59.03674 | 67.04375 |
| 97  | 46.09364 | 58.97183 | 66.98822 |
| 98  | 46.0597  | 58.74718 | 66.8515  |
| 99  | 46.03468 | 58.58292 | 66.79029 |
| 100 | 46.01682 | 58.51501 | 66.65494 |

|     |          |          |          |
|-----|----------|----------|----------|
| 101 | 46.00252 | 58.37449 | 66.46671 |
| 102 | 45.98644 | 58.2938  | 66.38935 |
| 103 | 45.94892 | 58.17841 | 66.24754 |
| 104 | 45.87209 | 57.83612 | 66.13404 |
| 105 | 45.74524 | 57.68834 | 66.03825 |
| 106 | 45.54691 | 57.40843 | 65.97739 |
| 107 | 45.3343  | 57.25014 | 65.85505 |
| 108 | 45.08952 | 57.02403 | 65.78677 |
| 109 | 44.84296 | 56.93297 | 65.6845  |
| 110 | 44.61605 | 56.75887 | 65.50098 |
| 111 | 44.40343 | 56.5804  | 65.46285 |
| 112 | 44.2051  | 56.37451 | 65.37195 |
| 113 | 44.0318  | 56.09861 | 65.29796 |
| 114 | 43.84062 | 55.96213 | 65.12465 |
| 115 | 43.67446 | 55.7446  | 65.06139 |
| 116 | 43.48685 | 55.56857 | 64.84955 |
| 117 | 43.31712 | 55.30714 | 64.53168 |
| 118 | 43.15096 | 55.1019  | 64.47763 |
| 119 | 42.98479 | 54.79444 | 64.40991 |
| 120 | 42.83828 | 54.23162 | 64.40451 |
